# Supplementary material for: SARS-CoV-2 N-Antigen Quantification in Respiratory Tract, Plasma and Urine: Kinetics and Association with RT-qPCR Results
Source: MDPI journal article supplement (doi:10.3390/v15051041), 2023-04-24
Supplement: s1 [file s1]

**Supplementary Table S1:** Clinical and biological features of all patients

|                                                              | N  | Median [Minimum,Maximum];<br>Or n (%) |
|--------------------------------------------------------------|----|---------------------------------------|
| <b>Time between first positive test and inclusion (days)</b> | 26 | 3 [0 ; 11]                            |
| <b>Age (years)</b>                                           | 26 | 67 [27 ; 86]                          |
| <b>Comorbidities</b>                                         |    |                                       |
| Chronic cardiac disease                                      | 25 | 7 (28 %)                              |
| Hypertension                                                 | 23 | 8 (35 %)                              |
| Chronic pulmonary disease                                    | 25 | 5 (20 %)                              |
| Asthma                                                       | 25 | 2 (8.0 %)                             |
| Chronic kidney disease                                       | 25 | 1 (4.0 %)                             |
| Obesity                                                      | 26 | 8 (31 %)                              |
| Diabetes                                                     | 24 | 3 (12 %)                              |
| <b>ICU admission</b>                                         | 26 | 25 (96 %)                             |
| <b>Death while in hospital</b>                               | 26 | 12 (46 %)                             |
| <b>Symptoms</b>                                              |    |                                       |
| Fever                                                        | 26 | 23 (88 %)                             |
| Cough                                                        | 26 | 16 (62 %)                             |
| Diarrhea                                                     | 26 | 6 (23 %)                              |
| Anosmia                                                      | 14 | 2 (14 %)                              |
| <b>Biology</b>                                               |    |                                       |
| Hemoglobin (g/dL)                                            | 22 | 14.8 [10.0 ; 17.1]                    |
| Lymphocyte (G/L)                                             | 21 | 0.70 [0.28 ; 2.76]                    |
| Platelets (G/L)                                              | 21 | 178 [121 ; 337]                       |
| ALT (U/L)                                                    | 16 | 46.0 [1.3 ; 660.0]                    |
| AST (U/L)                                                    | 16 | 72.0 [29.1 ; 596.0]                   |
| Total Bilirubin (μmol/L)                                     | 14 | 12.0 [4.0 ; 37.0]                     |
| Urea (mmol/L)                                                | 21 | 7.0 [3.0 ; 15.1]                      |
| Creatinin (μmol/L)                                           | 22 | 81 [70 ; 209]                         |
| C-reactive protein (mg/L)                                    | 17 | 136 [10 ; 223]                        |

**Supplementary Table S2:** Members of French COVID cohort study group.

| <b>Prénom</b> | <b>Nom</b>         | <b>@</b>                                                                                         | <b>Affiliation</b>                      |
|---------------|--------------------|--------------------------------------------------------------------------------------------------|-----------------------------------------|
| Laurent       | ABEL               | <a href="mailto:laurent.abel@inserm.fr">laurent.abel@inserm.fr</a>                               | Inserm UMR 1163, Paris, France          |
| Amal          | ABROUS             | <a href="mailto:amal.abrous@inserm.fr">amal.abrous@inserm.fr</a>                                 | Inserm sponsor, Paris, France           |
| Claire        | ANDREJAK           | <a href="mailto:andrejak.claire@chu-amiens.fr">andrejak.claire@chu-amiens.fr</a>                 | CHU Amiens, France                      |
| François      | ANGOULVANT         | <a href="mailto:francois.angoulvant@aphp.fr">francois.angoulvant@aphp.fr</a>                     | Hôpital Necker, Paris, France           |
| Delphine      | BACHELET           | <a href="mailto:delphine.bachelet@aphp.fr">delphine.bachelet@aphp.fr</a>                         | Hôpital Bichat, Paris, France           |
| Marie         | BARTOLI            | <a href="mailto:marie.bartoli@anrs.fr">marie.bartoli@anrs.fr</a>                                 | ANRS, Paris, France                     |
| Sylvie        | BEHILILL           | <a href="mailto:sylvie.behillil@pasteur.fr">sylvie.behillil@pasteur.fr</a>                       | Pasteur Institute, Paris, France        |
| Marine        | BELUZE             | <a href="mailto:marine.beluze@aphp.fr">marine.beluze@aphp.fr</a>                                 | F-CRIN Partners Platform, Paris, France |
| Krishna       | BHAVSAR            | <a href="mailto:krishna.bhavsar@aphp.fr">krishna.bhavsar@aphp.fr</a>                             | Hôpital Bichat, Paris, France           |
| Lila          | BOUADMA            | <a href="mailto:lila.bouadma@aphp.fr">lila.bouadma@aphp.fr</a>                                   | Hôpital Bichat, Paris, France           |
| Minerva       | CERVANTES-GONZALEZ | <a href="mailto:minerva.cervantes@inserm.fr">minerva.cervantes@inserm.fr</a>                     | Hôpital Bichat, Paris, France           |
| Anissa        | CHAIR              | <a href="mailto:anissa.chair@aphp.fr">anissa.chair@aphp.fr</a>                                   | Hôpital Bichat, Paris, France           |
| Charlotte     | CHARPENTIER        | <a href="mailto:charlotte.charpentier@aphp.fr">charlotte.charpentier@aphp.fr</a>                 | Hôpital Bichat, Paris, France           |
| Léo           | CHENARD            | <a href="mailto:leo.chenard@aphp.fr">leo.chenard@aphp.fr</a>                                     | Hôpital Bichat, Paris, France           |
| Catherine     | CHIROUZE           | <a href="mailto:catherine.chirouze@univ-fcomte.fr">catherine.chirouze@univ-fcomte.fr</a>         | CHRU Jean Minjoz, Besançon, France      |
| Sandrine      | COUFFIN-CADIERGUES | <a href="mailto:sandrine.couffin-cadiergues@inserm.fr">sandrine.couffin-cadiergues@inserm.fr</a> | Inserm sponsor, Paris, France           |
| Camille       | COUFFIGNAL         | <a href="mailto:camille.couffignal@aphp.fr">camille.couffignal@aphp.fr</a>                       | Hôpital Bichat, Paris, France           |
| Nathalie      | DE CASTRO          | <a href="mailto:nathalie.de-castro@aphp.fr">nathalie.de-castro@aphp.fr</a>                       | Hôpital Saint Louis, Paris, France      |
| Marie-Pierre  | DEBRAY             | <a href="mailto:marie-pierre.debray@aphp.fr">marie-pierre.debray@aphp.fr</a>                     | Hôpital Bichat, Paris, France           |
| Dominique     | DEPLANQUE          | <a href="mailto:Dominique.DEPLANQUE@chru-lille.fr">Dominique.DEPLANQUE@chru-lille.fr</a>         | Hôpital Calmette, Lille, France         |
| Diane         | DESCAMPS           | <a href="mailto:diane.descamps@aphp.fr">diane.descamps@aphp.fr</a>                               | Hôpital Bichat, Paris, France           |
| Alpha         | DIALLO             | <a href="mailto:alpha.diallo@inserm.fr">alpha.diallo@inserm.fr</a>                               | ANRS, Paris, France                     |
| Fernanda      | DIAS DA SILVA      | <a href="mailto:fernanda.dias-da-silva@inserm.fr">fernanda.dias-da-silva@inserm.fr</a>           | Inserm sponsor, Paris, France           |

|                |                 |                                                                                    |                                                  |
|----------------|-----------------|------------------------------------------------------------------------------------|--------------------------------------------------|
| Céline         | DORIVAL         | <a href="mailto:celine.dorival@iplesp.upmc.fr">celine.dorival@iplesp.upmc.fr</a>   | Inserm UMR 1136, Paris, France                   |
| Xavier         | DUVAL           | <a href="mailto:xavier.duval@aphp.fr">xavier.duval@aphp.fr</a>                     | Hôpital Bichat, Paris, France                    |
| Philippine     | ELOY            | <a href="mailto:philippine.eloy@aphp.fr">philippine.eloy@aphp.fr</a>               | Hôpital Bichat, Paris, France                    |
| Vincent        | ENOUF           | <a href="mailto:vincent.enouf@pasteur.fr">vincent.enouf@pasteur.fr</a>             | Pasteur Institute, Paris, France                 |
| Hélène         | ESPEROU         | <a href="mailto:helene.esperou@inserm.fr">helene.esperou@inserm.fr</a>             | Inserm sponsor, Paris, France                    |
| Marina         | ESPOSITO-FARESE | <a href="mailto:marina.esposito-farese@aphp.fr">marina.esposito-farese@aphp.fr</a> | Hôpital Bichat, Paris, France                    |
| Manuel         | ETIENNE         | <a href="mailto:Manuel.Etienne@chu-rouen.fr">Manuel.Etienne@chu-rouen.fr</a>       | CHU Rouen, France                                |
| Aline-Marie    | FLORENCE        | <a href="mailto:aline-marie.florence@aphp.fr">aline-marie.florence@aphp.fr</a>     | Hôpital Bichat, Paris, France                    |
| Alexandre      | GAYMARD         | <a href="mailto:alexandre.gaymard@chu-lyon.fr">alexandre.gaymard@chu-lyon.fr</a>   | Inserm UMR 1111, Lyon, France                    |
| Jade           | GHOSN           | <a href="mailto:jade.ghosn@aphp.fr">jade.ghosn@aphp.fr</a>                         | Hôpital Bichat, Paris, France                    |
| Tristan        | GIGANTE         | <a href="mailto:T.GIGANTE@chru-nancy.fr">T.GIGANTE@chru-nancy.fr</a>               | F-CRIN INI-CRCT, Nancy, France                   |
| Morgane        | GILG            | <a href="mailto:M.GILG@chru-nancy.fr">M.GILG@chru-nancy.fr</a>                     | F-CRIN INI-CRCT, Nancy, France                   |
| François       | GOEHRINGER      | <a href="mailto:f.goehringer@chru-nancy.fr">f.goehringer@chru-nancy.fr</a>         | CHU Nancy, France                                |
| Jérémie        | GUEDJ           | <a href="mailto:jeremie.guedj@inserm.fr">jeremie.guedj@inserm.fr</a>               | Inserm UMR 1137, Paris, France                   |
| Ikram          | HOUAS           | <a href="mailto:ikram.houas@inserm.fr">ikram.houas@inserm.fr</a>                   | Inserm sponsor, Paris, France                    |
| Isabelle       | HOFFMANN        | <a href="mailto:isabelle.hoffmann@aphp.fr">isabelle.hoffmann@aphp.fr</a>           | Hôpital Bichat, Paris, France                    |
| Jean-Sébastien | HULOT           | <a href="mailto:jean-sebastien.hulot@aphp.fr">jean-sebastien.hulot@aphp.fr</a>     | Hôpital Européen Georges Pompidou, Paris, France |
| Salma          | JAAFOURA        | <a href="mailto:salma.jaafoura@inserm.fr">salma.jaafoura@inserm.fr</a>             | Inserm sponsor, Paris, France                    |
| Simon          | JAMARD          | <a href="mailto:simon.jamard@univ-tours.fr">simon.jamard@univ-tours.fr</a>         | Hôpital Bretonneau, Tours, France                |
| Ouifiya        | KAFIF           | <a href="mailto:ouifiya.kafif@aphp.fr">ouifiya.kafif@aphp.fr</a>                   | Hôpital Bichat, Paris, France                    |
| Antoine        | KHALIL          | <a href="mailto:antoine.khalil@aphp.fr">antoine.khalil@aphp.fr</a>                 | Hôpital Bichat, Paris, France                    |
| Nadhem         | LAFHEJ          | <a href="mailto:nadhem.lafhej@aphp.fr">nadhem.lafhej@aphp.fr</a>                   | Hôpital Bichat, Paris, France                    |
| Cédric         | LAOUÉNAN        | <a href="mailto:cedric.laouenan@aphp.fr">cedric.laouenan@aphp.fr</a>               | Hôpital Bichat, Paris, France                    |
| Samira         | LARIBI          | <a href="mailto:samira.laribi@aphp.fr">samira.laribi@aphp.fr</a>                   | Hôpital Bichat, Paris, France                    |
| Minh           | LE              | <a href="mailto:minh.le@aphp.fr">minh.le@aphp.fr</a>                               | Hôpital Bichat, Paris, France                    |
| Quentin        | LE HINGRAT      | <a href="mailto:quentin.lehingrat@aphp.fr">quentin.lehingrat@aphp.fr</a>           | Hôpital Bichat, Paris, France                    |
| Soizic         | LE MESTRE       | <a href="mailto:soizic.le_mestre@anrs.fr">soizic.le_mestre@anrs.fr</a>             | ANRS-MIE, Paris, France                          |

|               |                |                                                                                              |                                                                      |
|---------------|----------------|----------------------------------------------------------------------------------------------|----------------------------------------------------------------------|
| Sophie        | LETROU         | <a href="mailto:sophie.letrou@aphp.fr">sophie.letrou@aphp.fr</a>                             | Hôpital Bichat, Paris, France                                        |
| Yves          | LEVY           | <a href="mailto:yves.levy@inserm.fr">yves.levy@inserm.fr</a>                                 | Vaccine Research Institute (VRI), Inserm UMR 955,<br>Créteil, France |
| Bruno         | LINA           | <a href="mailto:bruno.lina@chu-lyon.fr">bruno.lina@chu-lyon.fr</a>                           | Inserm UMR 1111, Lyon, France                                        |
| Guillaume     | LINGAS         | <a href="mailto:guillaume.lingas@inserm.fr">guillaume.lingas@inserm.fr</a>                   | Inserm UMR 1137, Paris, France                                       |
| Denis         | MALVY          | <a href="mailto:denis.malvy@chu-bordeaux.fr">denis.malvy@chu-bordeaux.fr</a>                 | CHU Bordeaux, France                                                 |
| France        | MENTRÉ         | <a href="mailto:france.mentre@inserm.fr">france.mentre@inserm.fr</a>                         | Hôpital Bichat, Paris, France                                        |
| Hugo          | MOUQUET        | <a href="mailto:hugo.mouquet@pasteur.fr">hugo.mouquet@pasteur.fr</a>                         | Pasteur Institute, Paris, France                                     |
| Nadège        | NEANT          | <a href="mailto:nadege.neant@inserm.fr">nadege.neant@inserm.fr</a>                           | Inserm UMR 1137, Paris, France                                       |
| Christelle    | PAUL           | <a href="mailto:christelle.paul@anrs.fr">christelle.paul@anrs.fr</a>                         | ANRS-MIE, Paris, France                                              |
| Aurélié       | PAPADOPOULOS   | <a href="mailto:aurelie.papadopoulos@inserm.fr">aurelie.papadopoulos@inserm.fr</a>           | Inserm sponsor, Paris, France                                        |
| Ventzislava   | PETROV-SANCHEZ | <a href="mailto:ventzislava.petrov-sanchez@anrs.fr">ventzislava.petrov-sanchez@anrs.fr</a>   | ANRS-MIE, Paris, France                                              |
| Gilles        | PEYTAVIN       | <a href="mailto:gilles.peytavin@aphp.fr">gilles.peytavin@aphp.fr</a>                         | Hôpital Bichat, Paris, France                                        |
| Valentine     | PIQUARD        | <a href="mailto:valentine.piquard@aphp.fr">valentine.piquard@aphp.fr</a>                     | Hôpital Bichat, Paris, France                                        |
| Olivier       | PICONE         | <a href="mailto:olivier.picone@aphp.fr">olivier.picone@aphp.fr</a>                           | Hôpital Louis Mourier, Colombes, France                              |
| Manuel        | ROSA-CALATRAVA | <a href="mailto:manuel.rosa-calatrava@univ-lyon1.fr">manuel.rosa-calatrava@univ-lyon1.fr</a> | Inserm UMR 1111, Lyon, France                                        |
| Bénédicte     | ROSSIGNOL      | <a href="mailto:B.ROSSIGNOL@chru-nancy.fr">B.ROSSIGNOL@chru-nancy.fr</a>                     | F-CRIN INI-CRCT, Nancy, France                                       |
| Patrick       | ROSSIGNOL      | <a href="mailto:p.rossignol@chru-nancy.fr">p.rossignol@chru-nancy.fr</a>                     | CHU Nancy, France                                                    |
| Carine        | ROY            | <a href="mailto:carine.roy@aphp.fr">carine.roy@aphp.fr</a>                                   | Hôpital Bichat, Paris, France                                        |
| Marion        | SCHNEIDER      | <a href="mailto:marion.schneider2@aphp.fr">marion.schneider2@aphp.fr</a>                     | Hôpital Bichat, Paris, France                                        |
| Coralie       | TARDIVON       | <a href="mailto:coralie.tardivon@aphp.fr">coralie.tardivon@aphp.fr</a>                       | Hôpital Bichat, Paris, France                                        |
| Jean-François | TIMSIT         | <a href="mailto:jean-francois.timsit@aphp.fr">jean-francois.timsit@aphp.fr</a>               | Hôpital Bichat, Paris, France                                        |
| Sarah         | TUBIANA        | <a href="mailto:sarah.tubiana@aphp.fr">sarah.tubiana@aphp.fr</a>                             | Hôpital Bichat, Paris, France                                        |
| Sylvie        | VAN DER WERF   | <a href="mailto:sylvie.van-der-werf@pasteur.fr">sylvie.van-der-werf@pasteur.fr</a>           | Pasteur Institute, Paris, France                                     |
| Benoit        | VISSEAU        | <a href="mailto:benoit.visseaux@aphp.fr">benoit.visseaux@aphp.fr</a>                         | Hôpital Bichat, Paris, France                                        |
| Aurélié       | WIEDEMANN      | <a href="mailto:aurelie.wiedemann@inserm.fr">aurelie.wiedemann@inserm.fr</a>                 | Vaccine Research Institute (VRI), Inserm UMR 955,<br>Créteil, France |
